# Supplementary material
Source: publisher figshare collection journal article supplement (https://acs.figshare.com/ndownloader/files/7641019)
Supplement: Supplementary file 1 [file 7641019]

COMPOUND	SMILES
1	O=C(O)C1=CC(C2=CC=CO2)=NN1
2	CC1=C(C(O)=O)SC2=C1C(NC(C(C)C)=N2)=O
3	CC1=C(C(O)=O)SC2=C1C(NC=N2)=O
4	CC1=C(C(O)=O)SC2=C1C(NC(/C=C/C3=CC(C=CN4)=C4C=C3)=N2)=O
5	NC1=C(C(OCC)=O)C(C)=C(C(OCC)=O)S1
6	O=C1C(C(C)=C(C(OCC)=O)S2)=C2N=C(CCl)N1
7	CC1=C(C(OCC)=O)SC2=C1C(N[R4])=NC([R2])=N2
8	O=C1C(C(C)=C(C(OCC)=O)S2)=C2N=C(CP(OCC)(OCC)=O)N1
9	O=C1C(C(C)=C(C(OCC)=O)S2)=C2N=C(CC[Ar])N1
10(da)	CC1=C(C(OCC)=O)SC2=C1C(NC)=NC(CCC3=CC=CC=C3)=N2
10(db)	CC1=C(C(OCC)=O)SC2=C1C(NCCN)=NC(CCC3=CC=CC=C3)=N2
10(dc)	CC1=C(C(OCC)=O)SC2=C1C(NCC3=CC=CC=C3)=NC(CCC4=CC=CC=C4)=N2
10(dd)	CC1=C(C(OCC)=O)SC2=C1C(NCCC3=CC=CC=C3)=NC(CCC4=CC=CC=C4)=N2
10(dg)	CC1=C(C(OCC)=O)SC2=C1C(NCCC3=CC=C(OC)C=C3)=NC(CCC4=CC=CC=C4)=N2
10(dh)	CC1=C(C(OCC)=O)SC2=C1C(NCCC3=CC(OC)=CC=C3)=NC(CCC4=CC=CC=C4)=N2
10(di)	CC1=C(C(OCC)=O)SC2=C1C(NCCC3=C(OC)C=CC=C3)=NC(CCC4=CC=CC=C4)=N2
10(dj)	CC1=C(C(OCC)=O)SC2=C1C(NCCC3=CC=C(F)C=C3)=NC(CCC4=CC=CC=C4)=N2
10(dk)	CC1=C(C(OCC)=O)SC2=C1C(NCCC3=CC(F)=CC=C3)=NC(CCC4=CC=CC=C4)=N2
10(dl)	CC1=C(C(OCC)=O)SC2=C1C(NCCC3=C(F)C=CC=C3)=NC(CCC4=CC=CC=C4)=N2
10(dm)	CC1=C(C(OCC)=O)SC2=C1C(NCCC3=CC=C(C)C=C3)=NC(CCC4=CC=CC=C4)=N2
10(dn)	CC1=C(C(OCC)=O)SC2=C1C(NCCC3=CC=C(C)C=C3)=NC(CCC4=CC=CC=C4)=N2
10(do)	CC1=C(C(OCC)=O)SC2=C1C(NCCC3=C(C)C=CC=C3)=NC(CCC4=CC=CC=C4)=N2
10(dp)	CC1=C(C(OCC)=O)SC2=C1C(NCCC3=CC=NC=C3)=NC(CCC4=CC=CC=C4)=N2
10(dr)	CC1=C(C(OCC)=O)SC2=C1C(NCCC3=CN=CC=C3)=NC(CCC4=CC=CC=C4)=N2
10(sa)	CC1=C(C(OCC)=O)SC2=C1C(NC)=NC(CCC3=CC=C(NC(C)=O)C=C3)=N2
10(ta)	CC1=C(C(OCC)=O)SC2=C1C(NC)=NC(CCC3=CC(NC(C)=O)=CC=C3)=N2
10(tu)	CC1=C(C(OCC)=O)SC2=C1C(NC)=NC(CCC3=C(NC(C)=O)C=CC=C3)=N2
10(dx)	CC1=C(C(OCC)=O)SC2=C1C(NC3CC(C=CC=C4)=C4C3)=NC(CCC5=CC=CC=C5)=N2
10(dy)	CC1=C(C(OCC)=O)SC2=C1C(NCCC3=CC(OC)=CC(OC)=C3)=NC(CCC4=CC=CC=C4)=N2
10(dz)	CC1=C(C(OCC)=O)SC2=C1C(NCCC3=CC=C4C(COC4)=C3)=NC(CCC5=CC=CC=C5)=N2
10(ea)	CC1=C(C(OCC)=O)SC2=C1C(NC)=NC(CCCC3=CC=CC=C3)=N2
10(fa)	CC1=C(C(OCC)=O)SC2=C1C(NC)=NC(CCCCC3=CC=CC=C3)=N2
10(ha)	CC1=C(C(OCC)=O)SC2=C1C(NC)=NC(CCC3=CC(OC)=CC=C3)=N2
10(ka)	CC1=C(C(OCC)=O)SC2=C1C(NC)=NC(CCC3=CC(F)=CC=C3)=N2
10(qa)	CC1=C(C(OCC)=O)SC2=C1C(NC)=NC(CCC3=CN=CC=C3)=N2
10(sb)	CC1=C(C(OCC)=O)SC2=C1C(NCCN)=NC(CCC3=CC=C(NC(C)=O)C=C3)=N2
10(sp)	CC1=C(C(OCC)=O)SC2=C1C(NCCC3=CC=NC=C3)=NC(CCC4=CC=C(NC(C)=O)C=C4)=N2
10(sq)	CC1=C(C(OCC)=O)SC2=C1C(NCCC3=CN=CC=C3)=NC(CCC4=CC=C(NC(C)=O)C=C4)=N2
10(sr)	CC1=C(C(OCC)=O)SC2=C1C(NCCC3=NC=CC=C3)=NC(CCC4=CC=C(NC(C)=O)C=C4)=N2
10(va)	CC1=C(C(OCC)=O)SC2=C1C(NC)=NC(CCC3=CC=CC(Cl)=C3)=N2
10(wa)	CC1=C(C(OCC)=O)SC2=C1C(NC)=NC(CCC3=CC=CC(C(F)(F)F)=C3)=N2
10(za)	CC1=C(C(OCC)=O)SC2=C1C(NC)=NC(CCC3=CC(COC4)=C4C=C3)=N2
51(ester)	CC1=C(C(OCC)=O)SC2=C1C(NC[C@H](OC)C3=CC=CC=C3)=NC(C[C@H](C)C4=CC=CC=C4)=N2
52(ester)	CC1=C(C(OCC)=O)SC2=C1C(NC[C@@H](OC)C3=CC=CC=C3)=NC(C[C@H](C)C4=CC=CC=C4)=N2
53(ester)	CC1=C(C(OCC)=O)SC2=C1C(NC[C@H](OC)C3=CC=CC=C3)=NC(C[C@@H](C)C4=CC=CC=C4)=N2
54(ester)	CC1=C(C(OCC)=O)SC2=C1C(NC[C@@H](OC)C3=CC=CC=C3)=NC(C[C@@H](C)C4=CC=CC=C4)=N2
55(ester)	CC1=C(C(OCC)=O)SC2=C1C(NC[C@@H](OC)C3=CC=CC=C3)=NC(CCC4=CC=C(NC(C)=O)C=C4)=N2
11	CC1=C(C(O)=O)SC2=C1C(N[R4])=NC([R2])=N2
12	O=C(O)C1=CC=C(C(O)=O)S1
13	O=C(OC)C1=CC=C(C(OC)=O)S1
14	O=C(OC)C1=CC(N)=C(C(OC)=O)S1
15	O=C1C(SC(C(OC)=O)=C2)=C2N=C([R2])N1
16	O=C(O)C1=CC2=C(S1)C(N[R4])=NC([R2])=N2
17	CC1=C(C(O)=O)SC2=C1C(NC)=NC(CCC3=CC=CC=C3)=N2
18	CC1=C(C(O)=O)SC2=C1C(NCCN)=NC(CCC3=CC=CC=C3)=N2
19	CC1=C(C(O)=O)SC2=C1C(NCC3=CC=CC=C3)=NC(CCC4=CC=CC=C4)=N2
20	CC1=C(C(O)=O)SC2=C1C(NCCC3=CC=CC=C3)=NC(CCC4=CC=CC=C4)=N2
21	CC1=C(C(O)=O)SC2=C1C(NCCC3=CC=C(OC)C=C3)=NC(CCC4=CC=CC=C4)=N2
22	CC1=C(C(O)=O)SC2=C1C(NCCC3=CC(OC)=CC=C3)=NC(CCC4=CC=CC=C4)=N2
23	CC1=C(C(O)=O)SC2=C1C(NCCC3=C(OC)C=CC=C3)=NC(CCC4=CC=CC=C4)=N2
24	CC1=C(C(O)=O)SC2=C1C(NCCC3=CC=C(F)C=C3)=NC(CCC4=CC=CC=C4)=N2
25	CC1=C(C(O)=O)SC2=C1C(NCCC3=CC(F)=CC=C3)=NC(CCC4=CC=CC=C4)=N2
26	CC1=C(C(O)=O)SC2=C1C(NCCC3=C(F)C=CC=C3)=NC(CCC4=CC=CC=C4)=N2
27	CC1=C(C(O)=O)SC2=C1C(NCCC3=CC=C(C)C=C3)=NC(CCC4=CC=CC=C4)=N2
28	CC1=C(C(O)=O)SC2=C1C(NCCC3=CC=C(C)C=C3)=NC(CCC4=CC=CC=C4)=N2
29	CC1=C(C(O)=O)SC2=C1C(NCCC3=C(C)C=CC=C3)=NC(CCC4=CC=CC=C4)=N2
30	CC1=C(C(O)=O)SC2=C1C(NCCC3=CC=NC=C3)=NC(CCC4=CC=CC=C4)=N2
31	CC1=C(C(O)=O)SC2=C1C(NCCC3=CN=CC=C3)=NC(CCC4=CC=CC=C4)=N2
32	CC1=C(C(O)=O)SC2=C1C(NCCC3=NC=CC=C3)=NC(CCC4=CC=CC=C4)=N2
33	CC1=C(C(O)=O)SC2=C1C(NC)=NC(CCC3=CC=C(NC(C)=O)C=C3)=N2
34	CC1=C(C(O)=O)SC2=C1C(NC)=NC(CCC3=CC(NC(C)=O)=CC=C3)=N2
35	CC1=C(C(O)=O)SC2=C1C(NC)=NC(CCC3=C(NC(C)=O)C=CC=C3)=N2
36	CC1=C(C(O)=O)SC2=C1C(NC3CC(C=CC=C4)=C4C3)=NC(CCC5=CC=CC=C5)=N2
37	CC1=C(C(O)=O)SC2=C1C(NCCC3=CC(OC)=CC(OC)=C3)=NC(CCC4=CC=CC=C4)=N2
38	CC1=C(C(O)=O)SC2=C1C(NCCC3=CC=C4C(COC4)=C3)=NC(CCC5=CC=CC=C5)=N2
39	CC1=C(C(O)=O)SC2=C1C(NC)=NC(CCCC3=CC=CC=C3)=N2
40	CC1=C(C(O)=O)SC2=C1C(NC)=NC(CCCCC3=CC=CC=C3)=N2
41	CC1=C(C(O)=O)SC2=C1C(NC)=NC(CCC3=CC(OC)=CC=C3)=N2
42	CC1=C(C(O)=O)SC2=C1C(NC)=NC(CCC3=CC(F)=CC=C3)=N2
43	CC1=C(C(O)=O)SC2=C1C(NC)=NC(CCC3=CN=CC=C3)=N2
44	CC1=C(C(O)=O)SC2=C1C(NCCN)=NC(CCC3=CC=C(NC(C)=O)C=C3)=N2
45	CC1=C(C(O)=O)SC2=C1C(NCCC3=NC=CC=C3)=NC(CCC4=CC=C(NC(C)=O)C=C4)=N2
46	CC1=C(C(O)=O)SC2=C1C(NC)=NC(CCC3=CC=CC(Cl)=C3)=N2
47	CC1=C(C(O)=O)SC2=C1C(NC)=NC(CCC3=CC=CC(C(F)(F)F)=C3)=N2
48	CC1=C(C(O)=O)SC2=C1C(NC)=NC(CCC3=CC(COC4)=C4C=C3)=N2
49	O=C(O)C1=CC2=C(S1)C(NC)=NC(CCC3=CC=CC=C3)=N2
50	O=C(O)C1=CC2=C(S1)C(NC)=NC(CCC3=CC=CC(OC)=C3)=N2
51	CC1=C(C(O)=O)SC2=C1C(NC[C@H](OC)C3=CC=CC=C3)=NC(C[C@H](C)C4=CC=CC=C4)=N2
52	CC1=C(C(O)=O)SC2=C1C(NC[C@@H](OC)C3=CC=CC=C3)=NC(C[C@H](C)C4=CC=CC=C4)=N2
53	CC1=C(C(O)=O)SC2=C1C(NC[C@H](OC)C3=CC=CC=C3)=NC(C[C@@H](C)C4=CC=CC=C4)=N2
54	CC1=C(C(O)=O)SC2=C1C(NC[C@@H](OC)C3=CC=CC=C3)=NC(C[C@@H](C)C4=CC=CC=C4)=N2
55	CC1=C(C(O)=O)SC2=C1C(NC[C@@H](OC)C3=CC=CC=C3)=NC(CCC4=CC=C(NC(C)=O)C=C4)=N2
